# Supplementary material
Source: PubMed Central journal article supplement (PMC6982533)
Supplement: NIHMS1055193-supplement-Sup_Material.pdf [file NIHMS1055193-supplement-Sup_Material.pdf]

## Supplementary Materials:

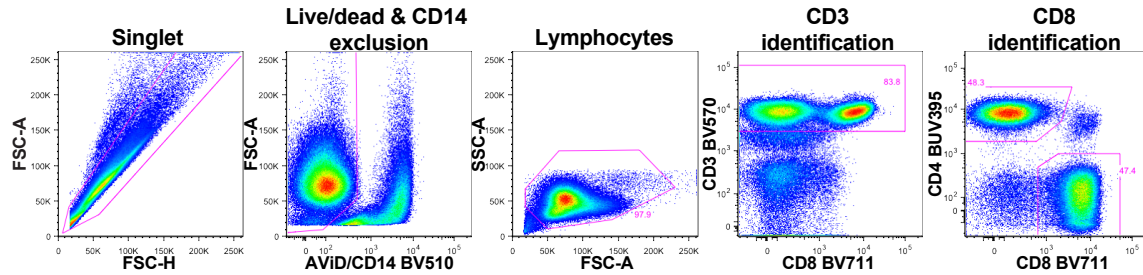

**Supplementary Figure 1: Gating strategy for intracellular assays.** Panels from left to right: Initial gating was on singlet (FSC-A vs. FSC-H), followed by exclusion of dead cells and CD14-expressing antigen presenting cells (FSC-A vs. AVID/CD14 BV510), followed by lymphocyte identification (FSC-A vs. SSC-A), followed by CD3 identification (CD3 BV570 vs CD8 BV711), followed by CD8 gating (CD4 BUV395 vs CD8 BV711). A representative example is shown.

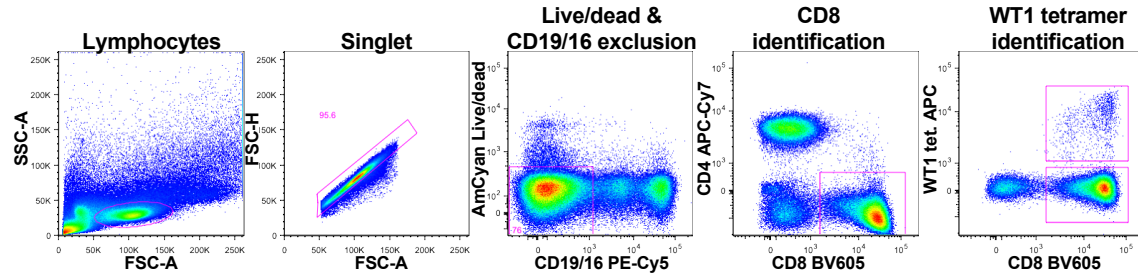

**Supplementary Figure 2: Gating strategy for surface stains.** Panels from left to right: Initial gating was on lymphocytes (SSC-A vs. FSC-A), followed by singlet exclusion (FSC-H vs FSC-A), followed by exclusion of dead cells and CD19/16-expressing cells (AmCyan Live/dead vs CD19/16 PE-Cy5), followed by CD8 identification (CD4 APC-Cy7 vs CD8 BV605), followed by WT1/HLA-A2 tet<sup>+</sup> cells identifying T<sub>TCR-C4</sub> (WT1 tet. APC vs CD8 BV605). A representative example is shown.

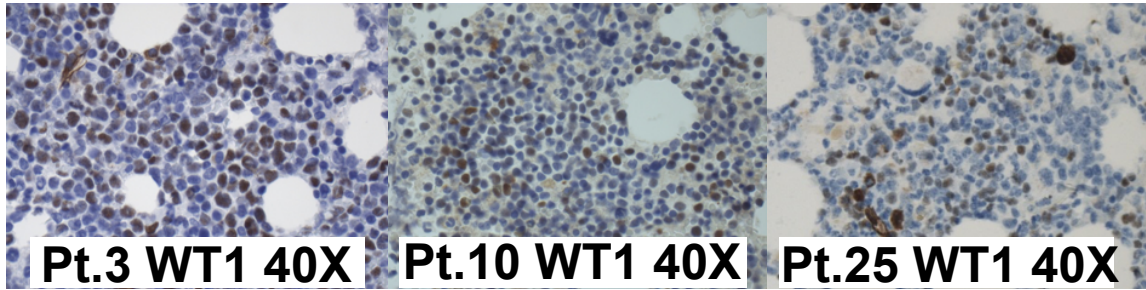

**Supplementary Figure 3: WT1 expression in leukemic cells.** Representative WT1 nuclear stain assessed by immunohistochemistry on the pre-HCT bone marrow biopsy performed for Pt. 3 (left), Pt. 10 (middle) and Pt (25 right panel). Magnification: 40X. The diameter of field is 0.4mm and each picture is representative of a larger (~0.3x 1cm) bone marrow biopsy core. On slide positive and batch negative controls marked appropriately.

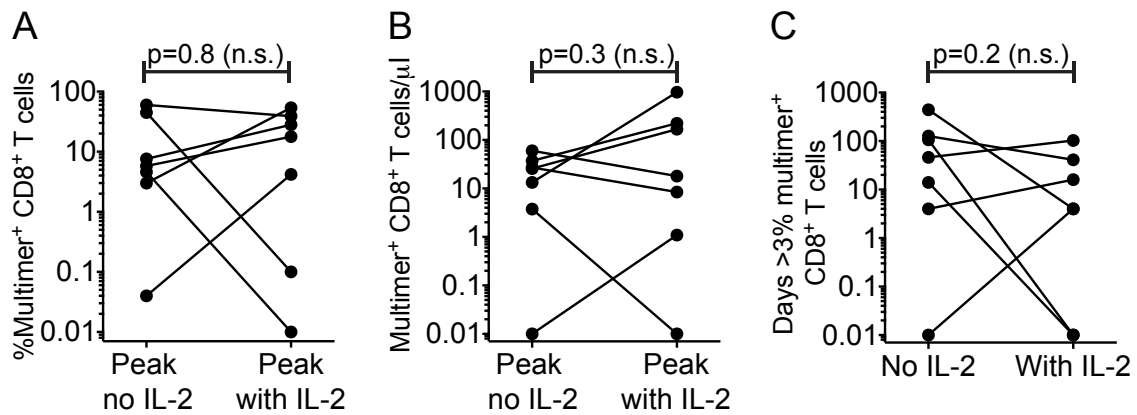

**Supplementary Figure 4: Effect of low-dose s.c IL-2 on post-infusion  $T_{TCR-C4}$  frequencies. (A)** Percent (% tetramer<sup>+</sup> CD8<sup>+</sup> T cells), **(B)** absolute numbers (tetramer<sup>+</sup> cells/ml) of peak frequencies and **(C)** days tetramer<sup>+</sup> remained >3% of CD8<sup>+</sup> T cells detected in peripheral blood of pts who received  $10^{10}$  cells/m<sup>2</sup> alone or the same cell dose followed by 14 days of low-dose s.c. IL-2 (n=7). A two-sided paired T-test was used for statistical analysis. n.s.: not significant (p>0.05). Peak frequencies and duration of  $T_{TCR-C4}$  >3% of CD8<sup>+</sup> T cells was not increased, compared to infusions of the same dose without IL-2, suggesting that shorter persistence observed in some patients reflected the nature of the infused substrate cells rather than a requirement for exogenous factors. Two-sided paired t-tests were used for statistical analysis.

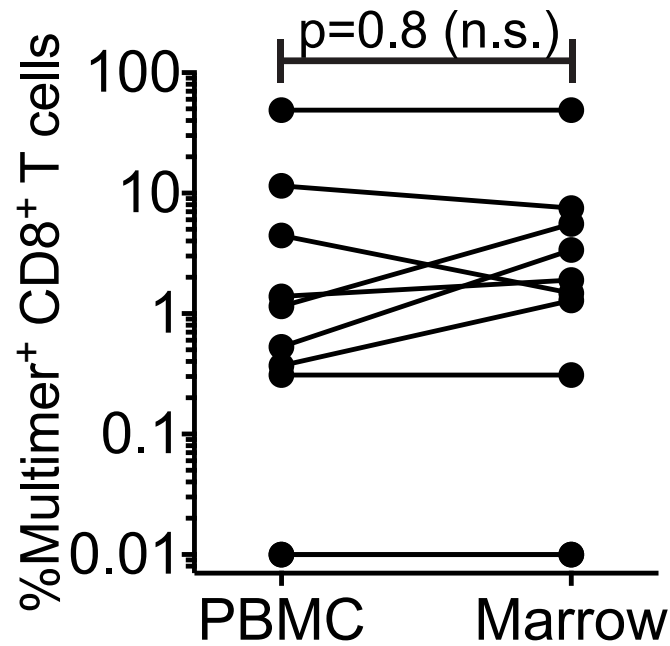

**Supplementary Figure 5: T<sub>TCR-C4</sub> do not preferentially localize to bone marrow in patients with no detectable AML.** Percent tetramer<sup>+</sup> CD8<sup>+</sup> cells in blood (left) and bone marrow (right) at time points from patients (n=9) in whom blood and BM could be analyzed concurrently at any timepoint after T<sub>TCR-C4</sub> infusions. A two-tailed paired t-test was used for statistical analysis. n.s.: non-significant (p<0.05). Two-sided paired t-tests were used for statistical analysis.

**Supplementary Table 1: Clonotype composition of infusion products.**

| Patients* | All Clonotypes**<br>composing T <sub>TCR-C4</sub> | Of all clonotypes composing T <sub>TCR-C4</sub> clonotypes<br>detected at any timepoint after infusions | Of clonotypes detected at any timepoint<br>after infusions, clonotypes that were<br>additionally expanded in product |
|-----------|---------------------------------------------------|---------------------------------------------------------------------------------------------------------|----------------------------------------------------------------------------------------------------------------------|
| Pt 3      | 76                                                | 17                                                                                                      | 17                                                                                                                   |
| Pt 10     | 213                                               | 39                                                                                                      | 38                                                                                                                   |
| Pt 11     | 71                                                | 47                                                                                                      | 41                                                                                                                   |
| Pt 12     | 369                                               | 366                                                                                                     | 197                                                                                                                  |
| Pt 13     | 74                                                | 39                                                                                                      | 38                                                                                                                   |
| Pt 17     | 139                                               | 28                                                                                                      | 23                                                                                                                   |
| Pt 18     | 213                                               | 102                                                                                                     | 98                                                                                                                   |
| Pt 20     | 203                                               | 34                                                                                                      | 33                                                                                                                   |
| Pt 21     | 2080                                              | 290                                                                                                     | 245                                                                                                                  |
| Pt 24     | 181                                               | 79                                                                                                      | 77                                                                                                                   |
| Pt 25     | 312                                               | 83                                                                                                      | 81                                                                                                                   |

\*Pt 16 did not have sufficient infusion product to perform clonotype composition analysis.

\*\*Only clonotypes with frequencies >0.001% are included.

**Supplementary Table 2: Pt/donor EBV and CMV status.**

| <b>Pt</b> | <b>Donor EBV status*</b> | <b>Patient/donor CMV status</b> | <b>infusions received</b> | <b>CMV viremias obtained**</b> |
|-----------|--------------------------|---------------------------------|---------------------------|--------------------------------|
| <b>3</b>  | <b>+</b>                 | <b>+/+</b>                      | <b>4</b>                  | <b>NO</b>                      |
| <b>10</b> | <b>+</b>                 | <b>-/-</b>                      | <b>1</b>                  | <b>NO</b>                      |
| <b>11</b> | <b>+</b>                 | <b>-/-</b>                      | <b>2</b>                  | <b>NO</b>                      |
| <b>12</b> | <b>+</b>                 | <b>-/+</b>                      | <b>1</b>                  | <b>YES</b>                     |
| <b>13</b> | <b>+</b>                 | <b>+/-</b>                      | <b>2</b>                  | <b>YES</b>                     |
| <b>16</b> | <b>+</b>                 | <b>+/-</b>                      | <b>2</b>                  | <b>YES</b>                     |
| <b>17</b> | <b>+</b>                 | <b>+/-</b>                      | <b>2</b>                  | <b>YES</b>                     |
| <b>18</b> | <b>+</b>                 | <b>+/-</b>                      | <b>1</b>                  | <b>YES</b>                     |
| <b>20</b> | <b>+</b>                 | <b>-/-</b>                      | <b>1</b>                  | <b>NO</b>                      |
| <b>21</b> | <b>+</b>                 | <b>+/-</b>                      | <b>1</b>                  | <b>YES</b>                     |
| <b>24</b> | <b>+</b>                 | <b>+/-</b>                      | <b>2</b>                  | <b>YES</b>                     |
| <b>25</b> | <b>+</b>                 | <b>+/+</b>                      | <b>2</b>                  | <b>YES</b>                     |

\*Pt EBV status was not directly determined, as per standard clinical practice at the FHCRC, since HCT recipients from EBV<sup>+</sup> donors sero-convert post-HCT.

\*\*CMV serologies were not performed for CMV<sup>-/-</sup> pt/donor pairs.
